# Supplementary material for: Exploring risk and protective urban environmental factors on mental health through exposure network mapping
Source: Research Square preprint supplement (doi:10.21203/rs.3.rs-7155816/v1), 2025-08-06
Supplement: Supplementary file 1 [file 5f81a8a79036a524e965dee3.docx]

**Supplementary files for “Measuring the impacts of urbanicity and different exposure factors on human brain through exposure network mapping” by Luo et al.**

# Validation of the ENM-urbanicity map on an independent dataset

This dataset was collected from the Chinese local community with the following recruitment conditions [1]: 1) Chinese of Han ancestry; 2) age ranging from 18 to 45; 3) no current or history of neurological or psychiatric disease met the criteria of Diagnostic and Statistical Manual of Mental Disorders, 4th Edition, Text Revision (DSM-IV-TR), assessed by psychiatrists using the Structured Clinical Interview for DSM-IV-TR Axis I Disorders, Non-patient Edition (SCID-I/NP); 4) no history of loss of consciousness for more than 5 min; 6) no abnormalities on subsequent magnetic resonance images, confirmed by a radiologist; and 7) currently living in Beijing for at least 1 year. This study was approved by the institutional ethics review board of Peking University Sixth Hospital. Written informed consent was obtained from all participants.

# Supplementary tables

**Table S1.** Search Items for each factor by PubMed from the latest ten years

**Table S2.** Complete list of studies on urbanicity.

**Table S3**. Peak regions of ENM results on urbanicity based on Brainnetome Atlas

**Table S4.** Complete list of studies on air pollution

**Table S5.** Complete list of studies on noise pollution

**Table S6.** Complete list of studies on green space

**Table S7.** Complete list of studies on household incomes

**Table S8.** Complete list of studies on Psychological and mental stress

**Table S9**. Peak regions of ENM results on stress based on Brainnetome Atlas

**Table S10.** Complete list of studies on Sleep

**Table S11**. Peak regions of ENM results on sleep based on Brainnetome Atlas

**Table S1.** Search Items for each factor by PubMed from the latest ten years

| **Types** | **Search Items** | **papers** | **Selected papers** | **Subjects** |
| --- | --- | --- | --- | --- |
| **Dataset 1**  (Urbanicity) | ((urbanicity OR urban OR urbanization) AND (magnetic resonance Imaging OR neuroimaging OR grey matter OR voxel OR cortical) AND (brain) AND (human)) | 408 | 23 | 6274 |
| **Dataset 2**  (Air pollution) | ((air pollution OR pollution) AND (magnetic resonance imaging OR neuroimaging OR grey matter OR voxel OR cortical) AND (brain) AND (human)) | 389 | 14 | 5617 |
| **Dataset 3**  (noise pollution) | ((noise exposure) AND (magnetic resonance imaging OR neuroimaging OR grey matter OR voxel OR cortical) AND (brain) AND (human)) | 158 | 8 | 515 |
| **Dataset 4**  (green space) | ((green landscape OR narrow space OR walkability OR outdoor activity) AND (magnetic resonance imaging OR neuroimaging OR grey matter OR voxel OR cortical) AND (brain) AND (human)) | 135 | 6 | 601 |
| **Dataset 5**  (incomes) | ((Household income OR poverty) AND (magnetic resonance imaging OR neuroimaging OR grey matter OR voxel OR cortical) AND (brain) AND (human)) | 237 | 10 | 1361 |
| **Dataset 6**  (Stress) | (stress) AND (neuroimaging) AND (brain) AND (human) NOT (disorders) NOT (review) NOT (diseases）NOT (injury) NOT (patients) NOT (EEG) NOT (MEG) | 557 | 37 | 4066 |
| **Dataset 7**  (Sleep) | ((sleep) AND (magnetic resonance imaging OR neuroimaging OR grey matter OR voxel OR cortical) AND (brain) AND (human)) NOT (disorders) NOT (review) NOT (diseases） NOT (injury) NOT (patients) NOT (EEG) NOT (MEG) | 779 | 40 | 5398 |

**Table S2.** Complete list of studies on urbanicity.

| **Order** | **Study** | **References** | **Order** | **Study** | **References** |
| --- | --- | --- | --- | --- | --- |
| 1 | Baena-Extremera et al. | [1] | 2 | Bratman et al. | [2] |
| 3 | Butler et al. | [3] | 4 | Chang et al. | [4] |
| 5 | Cheng et al. | [5] | 6 | Dadvand et al. | [6] |
| 7 | Dimitrov‑Discher et al. | [7] | 8 | Haddad et al. | [8] |
| 9 | Huang et al. | [9] | 10 | Khodaei et al. | [10] |
| 11 | Kramer et al. | [11] | 12 | Kühn et al.(a) | [12] |
| 13 | Kühn et al.(b) | [13] | 14 | Lammeyer et al. | [14] |
| 15 | McCutcheon et al. | [15] | 16 | Pujol et al. | [16] |
| 17 | Reed et al. | [17] | 18 | Stobbeet al. | [18] |
| 19 | Richter et al. | [19] | 20 | Xu et al. | [20] |
| 21 | Zhang et al. | [21] | 22 | Zhang et al. | [22] |
| 23 | Zhang et al. | [23] |  |  |  |

**Table S3**. Peak regions of ENM results on urbanicity based on Brainnetome Atlas

| **region** | **sub-region** | **max values** | **voxels** |
| --- | --- | --- | --- |
| SFG | A8m_r | 3.17 | 7 |
| SFG | A8dl_r | 4.81 | 19 |
| SFG | A9l_r | 3.59 | 8 |
| SFG | A9m_l | 4.10 | 28 |
| SFG | A9m_r | 3.86 | 27 |
| SFG | A10m_l | 4.62 | 8 |
| MFG | A9_46d_l | 6.40 | 100 |
| MFG | A9_46d_r | 5.89 | 82 |
| MFG | A46_l | 4.82 | 63 |
| MFG | A46_r | 3.65 | 29 |
| MFG | A8vl_l | 6.13 | 33 |
| IFG | A45c_r | 3.44 | 11 |
| OrG | A12_47l_l | 3.70 | 10 |
| OrG | A12_47l_r | 3.77 | 10 |
| IPL | A39c_l | 3.54 | 20 |
| IPL | A39c_r | 3.42 | 33 |
| IPL | A39rv_r | 3.29 | 27 |
| PCun | A5m_l | 4.21 | 9 |
| PCun | A5m_r | 3.93 | 12 |
| PCun | A31_r | 3.36 | 7 |
| INS | vIa_l | 4.16 | 20 |
| INS | vIa_r | 3.68 | 12 |
| CG | A24rv_l | 5.32 | 18 |
| CG | A24rv_r | 4.96 | 27 |
| CG | A32p_l | 4.84 | 73 |
| CG | A32p_r | 4.13 | 51 |
| CG | A23c_l | 4.77 | 29 |
| CG | A23c_r | 3.82 | 19 |
| CG | A32sg_r | 4.38 | 16 |
| BG | vCa_l | 3.65 | 25 |
| BG | vCa_r | 3.38 | 14 |
| BG | vmPu_l | 4.01 | 20 |
| BG | vmPu_r | 3.59 | 7 |
| Tha | mPFtha_l | 3.48 | 6 |
| Tha | mPFtha_r | 3.24 | 9 |
| Tha | rTtha_r | 3.35 | 7 |
| Tha | cTtha_r | 3.27 | 9 |
| Tha | lPFtha_l | 3.61 | 9 |

**Table S4.** Complete list of studies on air pollution

| Order | Study | References | Order | Study | References |
| --- | --- | --- | --- | --- | --- |
| 1 | Beckwith et al. | [24] | 2 | Gawryluk et al. | [25] |
| 3 | Iannilli et al. | [26] | 4 | Lamoureux-Tremblay et al. | [27] |
| 5 | Lubczynska et al. (childhood) | [28] | 6 | Lubczynska et al. (pregnancy) | [28] |
| 7 | Margolis et al. | [29] | 8 | Miller et al. | [30] |
| 9 | Pujol et al.(a) | [16] | 10 | Pujol et al.(b) | [31] |
| 11 | Takeuchi et al. | [32] | 12 | Vu et al. | [33] |
| 13 | Water et al. | [34] | 14 | Zhang *et al.* | [35] |

**Table S5.** Complete list of studies on noise pollution

| Order | Study | References | Order | Study | References |
| --- | --- | --- | --- | --- | --- |
| 1 | Asconeet al. | [36] | 2 | Cheng et al. | [37] |
| 3 | Dewey et al. | [38] | 4 | Forlimet al. | [39] |
| 5 | Martínez-Vilavella et al. | [40] | 6 | Quarto et al. | [41] |
| 7 | Simon et al. | [42] | 8 | Yu et al. | [43] |

**Table S6.** Complete list of studies on green space

| Order | Study | References | Order | Study | References |
| --- | --- | --- | --- | --- | --- |
| 1 | Baena-Extremera et al. | [1] | 2 | Chang et al. | [4] |
| 3 | Dadvand et al. | [6] | 4 | Dimitrov‑Discher et al. | [7] |
| 5 | Kühn et al.(a) | [12] | 6 | Kühn et al.(c) | [44] |

**Table S7.** Complete list of studies on household incomes

| Order | Study | References | Order | Study | References |
| --- | --- | --- | --- | --- | --- |
| 1 | Duval et al. | [45] | 2 | Finn et al. | [46] |
| 3 | Hanson et al. | [47] | 4 | Holz et al. | [48] |
| 5 | Liberzon et al. | [49] | 6 | Marshall et al. | [50] |
| 7 | Tomlinson et al. | [51] | 8 | Weissman et al. | [52] |
| 9 | White et al. | [53] | 10 | Ziegler et al. | [54] |

**Table S8.** Complete list of studies on Psychological and mental stress

| Order | Study | References | Order | Study | References |
| --- | --- | --- | --- | --- | --- |
| 1 | Ai et al. | [55] | 2 | Chang et al. | [56] |
| 3 | Clemens et al. | [57] | 4 | Corr et al. | [58] |
| 5 | Dahm et al. | [59] | 6 | Fan et al. | [60] |
| 7 | Goodman et al. (2016) | [61] | 8 | [Goodman](https://pubmed.ncbi.nlm.nih.gov/?term=Goodman+AM&cauthor_id=29555429)  et al. (2018) | [62] |
| 9 | Grande et al. | [63] | 10 | Harms et al. | [64] |
| 11 | Henze et al.(task1) | [65] | 12 | Henze et al.(task2) | [65] |
| 13 | Kim et al. | [66] | 14 | Kruse et al. | [67] |
| 15 | Lee et al. | [68] | 16 | Ma et al. | [69] |
| 17 | Martin-Perez et al. | [70] | 18 | [Meine](https://pubmed.ncbi.nlm.nih.gov/?term=Meine+LE&cauthor_id=34758383) et al. | [71] |
| 19 | Metz et al. | [72] | 20 | Niehaus et al. | [73] |
| 21 | Pagliaccio et al. | [74] | 22 | Reinelt et al. | [75] |
| 23 | Rosada et al. | [76] | 24 | Sevinc et al. (task1) | [77] |
| 25 | Sevinc et al. (task2) | [77] | 26 | Shields et al. | [78] |
| 27 | Sinha et al. | [79] | 28 | Sokołowski et al. | [80] |
| 29 | Spencer et al., | [81] | 30 | Taren et al. | [82] |
| 31 | Tomova et al. (2017) | [83] | 32 | Tomova et al. (2020) | [84] |
| 33 | Uhlig et al. | [85] | 34 | Uy et al. | [86] |
| 35 | Vidal-Ribas et al. | [87] | 36 | Yamamoto et al. | [88] |
| 37 | Zschucke et al. | [89] |  |  |  |

**Table S9**. Peak regions of ENM results on stress based on Brainnetome Atlas

| **region** | **sub-region** | **max values** | **voxels** |
| --- | --- | --- | --- |
| SFG | A8dl_l | 4.08 | 87 |
| SFG | A8dl_r | 4.05 | 79 |
| SFG | A9l_l | 3.67 | 12 |
| SFG | A9l_r | 4.02 | 58 |
| SFG | A9m_l | 4.16 | 62 |
| SFG | A9m_r | 4.58 | 124 |
| SFG | A10m_l | 4.81 | 164 |
| SFG | A10m_r | 4.38 | 137 |
| MFG | A9_46d_l | 3.70 | 19 |
| MFG | A9_46d_r | 3.85 | 52 |
| MFG | A46_l | 3.88 | 32 |
| MFG | A46_r | 3.55 | 22 |
| MFG | A8vl_l | 3.96 | 47 |
| MFG | A10l_r | 3.54 | 9 |
| OrG | A14m_l | 4.13 | 43 |
| OrG | A14m_r | 4.15 | 122 |
| OrG | A12_47o_l | 4.34 | 18 |
| OrG | A12_47o_r | 5.13 | 23 |
| OrG | A11l_l | 5.23 | 29 |
| OrG | A11l_r | 6.21 | 46 |
| OrG | A13_l | 3.44 | 16 |
| OrG | A12_47l_r | 5.16 | 8 |
| MTG | aSTS_r | 3.27 | 12 |
| PhG | A28_34_l | 3.53 | 10 |
| PhG | A28_34_r | 3.25 | 8 |
| IPL | A39c_l | 3.27 | 107 |
| IPL | A39c_r | 3.10 | 104 |
| IPL | A39rd_r | 3.02 | 6 |
| PCun | dmPOS_l | 3.44 | 43 |
| PCun | dmPOS_r | 3.35 | 53 |
| PCun | A31_l | 3.45 | 33 |
| PCun | A31_r | 3.41 | 41 |
| INS | vIa_l | 4.40 | 38 |
| INS | vIa_r | 4.21 | 30 |
| CG | A23d_l | 3.47 | 32 |
| CG | A23d_r | 3.50 | 44 |
| CG | A24rv_l | 7.00 | 38 |
| CG | A24rv_r | 5.69 | 65 |
| CG | A32p_l | 4.80 | 86 |
| CG | A32p_r | 4.21 | 33 |
| CG | A23v_l | 3.40 | 28 |
| CG | A23v_r | 3.34 | 17 |
| CG | A23c_l | 5.25 | 33 |
| CG | A23c_r | 6.18 | 21 |
| CG | A32sg_l | 4.62 | 184 |
| CG | A32sg_r | 4.48 | 116 |
| Amyg | mAmyg_l | 3.31 | 6 |
| Amyg | mAmyg_r | 3.53 | 12 |
| Hipp | rHipp_l | 3.79 | 69 |
| Hipp | rHipp_r | 3.67 | 77 |
| Hipp | cHipp_l | 4.63 | 71 |
| Hipp | cHipp_r | 4.69 | 78 |
| BG | vCa_l | 6.26 | 81 |
| BG | vCa_r | 5.65 | 52 |
| BG | NAC_l | 3.84 | 33 |
| BG | NAC_r | 4.56 | 25 |
| BG | vmPu_l | 5.31 | 40 |
| BG | vmPu_r | 4.23 | 16 |
| BG | dCa_l | 4.97 | 46 |
| BG | dCa_r | 6.58 | 68 |
| BG | dlPu_l | 4.57 | 20 |
| BG | dlPu_r | 4.65 | 13 |
| Tha | mPFtha_l | 3.55 | 6 |
| Tha | rTtha_l | 3.27 | 6 |
| Tha | rTtha_r | 4.02 | 19 |
| Tha | lPFtha_l | 4.04 | 8 |

**Table S10.** Complete list of studies on Sleep

| Order | Study | References | Order | Study | References |
| --- | --- | --- | --- | --- | --- |
| 1 | Akerstedt et al. | [90] | 2 | Alsameen et al. | [91] |
| 3 | Boes et al. | [92] | 4 | Cai et al. | [93] |
| 5 | Chai et al. | [94] | 6 | Fang et al. | [95] |
| 7 | Feng et al. | [96] | 8 | Guo et al. | [97] |
| 9 | Hermesdorf et al. | [98] | 10 | Kang et al. | [99] |
| 11 | Killgore et al. | [100] | 12 | Kim et al. | [101] |
| 13 | Klumpers et al. | [102] | 14 | Krause et al. | [103] |
| 15 | Lapidaire et al. | [104] | 16 | Lei et al. | [105] |
| 17 | Lei et al. | [106] | 18 | Li et al. | [107] |
| 19 | Liu et al. | [108] | 20 | Motomura et al. | [109] |
| 21 | Neumann et al. | [110] | 22 | Pan et al. | [111] |
| 23 | Poudel et al. | [112] | 24 | Samanta et al. | [113] |
| 25 | Shao et al. | [114] | 26 | Shen et al. | [115] |
| 27 | Sterpenich et al. | [116] | 28 | Sun et al. | [117] |
| 29 | Tashjian et al. | [118] | 30 | Tomasi et al. | [119] |
| 31 | Toschi et al. | [120] | 32 | Urrila et al. | [121] |
| 33 | van den Berg et al. | [122] | 34 | Wang et al. | [123] |
| 35 | Ye et al. | [124] | 36 | Zhang et al. | [125] |
| 37 | Zhang et al. | [126] | 38 | Zhang et al. | [127] |
| 39 | Zhao et al. | [128] | 40 | Zhu et al. | [129] |

**Table S11**. Peak regions of ENM results on sleep based on Brainnetome Atlas

| **region** | **sub-region** | **max values** | **voxels** |
| --- | --- | --- | --- |
| OrG | A11l_l | 4.11 | 22 |
| OrG | A11l_r | 3.83 | 14 |
| CG | A24rv_l | 5.07 | 36 |
| CG | A24rv_r | 4.92 | 23 |
| CG | A23c_l | 3.43 | 13 |
| CG | A23c_r | 4.97 | 9 |
| BG | vCa_l | 3.80 | 26 |
| BG | vCa_r | 3.45 | 9 |
| BG | GP_l | 3.38 | 17 |
| BG | vmPu_l | 3.48 | 29 |
| BG | vmPu_r | 3.17 | 6 |
| BG | dCa_l | 3.57 | 24 |
| BG | dCa_r | 3.97 | 34 |
| BG | dlPu_l | 3.56 | 35 |
| BG | dlPu_r | 3.56 | 6 |
| Tha | rTtha_r | 3.33 | 13 |
| Tha | lPFtha_l | 3.35 | 10 |

# Supplementary Figures


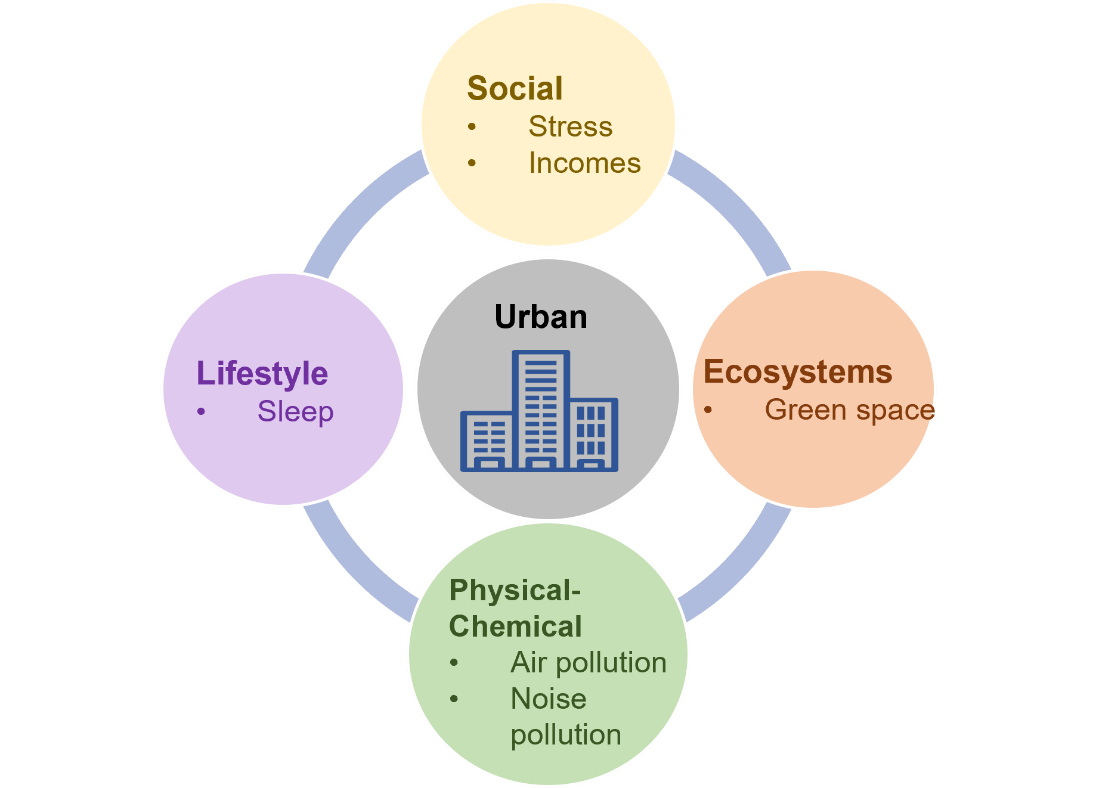


**Figure S1**. The selected representative exposure factors of the four domains[130].

# References

1. Baena-Extremera A, García JF, Martínez AC, Martín-Pérez C: **Sports in Natural Environment, Sports in Urban Environment: An fMRI Study about Stress and Attention/Awareness**. *Journal of sports science & medicine* 2021, **20**(4):789-798.

2. Bratman GN, Hamilton JP, Hahn KS, Daily GC, Gross JJ: **Nature experience reduces rumination and subgenual prefrontal cortex activation**. *Proc Natl Acad Sci U S A* 2015, **112**(28):8567-8572.

3. Butler O, Yang XF, Laube C, Kühn S, Immordino-Yang MH: **Community violence exposure correlates with smaller gray matter volume and lower IQ in urban adolescents**. *Hum Brain Mapp* 2018, **39**(5):2088-2097.

4. Chang DHF, Jiang B, Wong NHL, Wong JJ, Webster C, Lee TMC: **The human posterior cingulate and the stress-response benefits of viewing green urban landscapes**. *Neuroimage* 2021, **226**:117555.

5. Cheng W, Luo N, Zhang Y, Zhang X, Tan H, Zhang D, Sui J, Yue W, Yan H: **DNA Methylation and Resting Brain Function Mediate the Association between Childhood Urbanicity and Better Speed of Processing**. *Cereb Cortex* 2021, **31**(10):4709-4718.

6. Dadvand P, Pujol J, Macià D, Martínez-Vilavella G, Blanco-Hinojo L, Mortamais M, Alvarez-Pedrerol M, Fenoll R, Esnaola M, Dalmau-Bueno A *et al*: **The Association between Lifelong Greenspace Exposure and 3-Dimensional Brain Magnetic Resonance Imaging in Barcelona Schoolchildren**. *Environmental health perspectives* 2018, **126**(2):027012.

7. Dimitrov-Discher A, Wenzel J, Kabisch N, Hemmerling J, Bunz M, Schöndorf J, Walter H, Veer IM, Adli M: **Residential green space and air pollution are associated with brain activation in a social-stress paradigm**. *Sci Rep* 2022, **12**(1):10614.

8. Haddad L, Schafer A, Streit F, Lederbogen F, Grimm O, Wust S, Deuschle M, Kirsch P, Tost H, Meyer-Lindenberg A: **Brain structure correlates of urban upbringing, an environmental risk factor for schizophrenia**. *Schizophr Bull* 2015, **41**(1):115-122.

9. Huang W, Sun X, Zhang X, Xu R, Qian Y, Zhu J: **Neural Correlates of Early-Life Urbanization and Their Spatial Relationships with Gene Expression, Neurotransmitter, and Behavioral Domain Atlases**. *Molecular neurobiology* 2024, **61**(9):6407-6422.

10. Khodaei M, Dobbins DL, Laurienti PJ, Simpson SL, Arcury TA, Quandt SA, Anderson KA, Scott RP, Burdette JH: **Neuroanatomical differences in Latinx children from rural farmworker families and urban non-farmworker families and related associations with pesticide exposure**. *Heliyon* 2023, **9**(11):e21929.

11. Krämer B, Diekhof EK, Gruber O: **Effects of city living on the mesolimbic reward system-An fmri study**. *Hum Brain Mapp* 2017, **38**(7):3444-3453.

12. Kühn S, Düzel S, Mascherek A, Eibich P, Krekel C, Kolbe J, Goebel J, Gallinat J, Wagner GG, Lindenberger U: **Urban green is more than the absence of city: Structural and functional neural basis of urbanicity and green space in the neighbourhood of older adults**. *Landscape and Urban Planning* 2021, **214**:104196.

13. Kühn S, Banaschewski T, Bokde ALW, Büchel C, Quinlan EB, Desrivières S, Flor H, Grigis A, Garavan H, Gowland P *et al*: **Brain structure and habitat: Do the brains of our children tell us where they have been brought up?** *Neuroimage* 2020, **222**:117225.

14. Lammeyer S, Dietsche B, Dannlowski U, Kircher T, Krug A: **Evidence of brain network aberration in healthy subjects with urban upbringing - A multimodal DTI and VBM study**. *Schizophr Res* 2019, **208**:133-137.

15. McCutcheon RA, Bloomfield MAP, Dahoun T, Mehta M, Howes OD: **Chronic psychosocial stressors are associated with alterations in salience processing and corticostriatal connectivity**. *Schizophr Res* 2019, **213**:56-64.

16. Pujol J, Martínez-Vilavella G, Macià D, Fenoll R, Alvarez-Pedrerol M, Rivas I, Forns J, Blanco-Hinojo L, Capellades J, Querol X *et al*: **Traffic pollution exposure is associated with altered brain connectivity in school children**. *Neuroimage* 2016, **129**:175-184.

17. Reed JL, D'Ambrosio E, Marenco S, Ursini G, Zheutlin AB, Blasi G, Spencer BE, Romano R, Hochheiser J, Reifman A *et al*: **Interaction of childhood urbanicity and variation in dopamine genes alters adult prefrontal function as measured by functional magnetic resonance imaging (fMRI)**. *PLoS One* 2018, **13**(4):e0195189.

18. Stobbe E, Forlim CG, Kuhn S: **Impact of exposure to natural versus urban soundscapes on brain functional connectivity, BOLD entropy and behavior**. *Environmental research* 2024, **244**:117788.

19. Richter A, Al-Bayati M, Paraskevopoulou F, Kramer B, Pruessner JC, Binder EB, Gruber O: **Interaction of FKBP5 variant rs3800373 and city living alters the neural stress response in the anterior cingulate cortex**. *Stress* 2021, **24**(4):421-429.

20. Xu J, Liu X, Li Q, Goldblatt R, Qin W, Liu F, Chu C, Luo Q, Ing A, Guo L *et al*: **Global urbanicity is associated with brain and behaviour in young people**. *Nat Hum Behav* 2022, **6**(2):279-293.

21. Zhang X, Yan H, Yu H, Zhao X, Shah S, Dong Z, Yang G, Zhang X, Muse T, Li J *et al*: **Childhood urbanicity interacts with polygenic risk for depression to affect stress-related medial prefrontal function**. *Transl Psychiatry* 2021, **11**(1):522.

22. Zhang X, Yan H, Yu H, Zhang Y, Tan HY, Zhang D, Yue W: **The effects of environmental factors associated with childhood urbanicity on brain structure and cognition**. *BMC psychiatry* 2023, **23**(1):598.

23. Zhang X, Zhang Y, Yan H, Yu H, Zhang D, Mattay VS, Tan HY, Yue W: **Childhood urbanicity is associated with emotional episodic memory-related striatal function and common variation in NTRK2**. *BMC Med* 2024, **22**(1):146.

24. Beckwith T, Cecil K, Altaye M, Severs R, Wolfe C, Percy Z, Maloney T, Yolton K, LeMasters G, Brunst K *et al*: **Reduced gray matter volume and cortical thickness associated with traffic-related air pollution in a longitudinally studied pediatric cohort**. *PLoS One* 2020, **15**(1):e0228092.

25. Gawryluk JR, Palombo DJ, Curran J, Parker A, Carlsten C: **Brief diesel exhaust exposure acutely impairs functional brain connectivity in humans: a randomized controlled crossover study**. *Environ Health* 2023, **22**(1):7.

26. Iannilli E, Gasparotti R, Hummel T, Zoni S, Benedetti C, Fedrighi C, Tang CY, Van Thriel C, Lucchini RG: **Effects of Manganese Exposure on Olfactory Functions in Teenagers: A Pilot Study**. *PLoS One* 2016, **11**(1):e0144783.

27. Lamoureux-Tremblay V, Chauret M, Muckle G, Maheu F, Suffren S, Jacobson SW, Jacobson JL, Ayotte P, Lepore F, Saint-Amour D: **Altered functional activations of prefrontal brain areas during emotional processing of fear in Inuit adolescents exposed to environmental contaminants**. *Neurotoxicol Teratol* 2021, **85**:106973.

28. Lubczynska MJ, Muetzel RL, El Marroun H, Hoek G, Kooter IM, Thomson EM, Hillegers M, Vernooij MW, White T, Tiemeier H *et al*: **Air pollution exposure during pregnancy and childhood and brain morphology in preadolescents**. *Environ Res* 2021, **198**:110446.

29. Margolis AE, Pagliaccio D, Ramphal B, Banker S, Thomas L, Robinson M, Honda M, Sussman T, Posner J, Kannan K *et al*: **Prenatal environmental tobacco smoke exposure alters children's cognitive control circuitry: A preliminary study**. *Environ Int* 2021, **155**:106516.

30. Miller JG, Dennis EL, Heft-Neal S, Jo B, Gotlib IH: **Fine Particulate Air Pollution, Early Life Stress, and Their Interactive Effects on Adolescent Structural Brain Development: A Longitudinal Tensor-Based Morphometry Study**. *Cereb Cortex* 2022, **32**(10):2156-2169.

31. Pujol J, Fenoll R, Macia D, Martinez-Vilavella G, Alvarez-Pedrerol M, Rivas I, Forns J, Deus J, Blanco-Hinojo L, Querol X *et al*: **Airborne copper exposure in school environments associated with poorer motor performance and altered basal ganglia**. *Brain Behav* 2016, **6**(6):e00467.

32. Takeuchi H, Taki Y, Nouchi R, Yokoyama R, Kotozaki Y, Nakagawa S, Sekiguchi A, Iizuka K, Hanawa S, Araki T *et al*: **Lead exposure is associated with functional and microstructural changes in the healthy human brain**. *Communications biology* 2021, **4**(1):912.

33. Vu HT, Pham TN, Yokawa T, Nishijo M, The TP, Do Q, Nishino Y, Nishijo H: **Alterations in Regional Brain Regional Volume Associated with Dioxin Exposure in Men Living in the Most Dioxin-Contaminated Area in Vietnam: Magnetic Resonance Imaging (MRI) Analysis Using Voxel-Based Morphometry (VBM)**. *Toxics* 2021, **9**(12).

34. de Water E, Proal E, Wang V, Medina SM, Schnaas L, Tellez-Rojo MM, Wright RO, Tang CY, Horton MK: **Prenatal manganese exposure and intrinsic functional connectivity of emotional brain areas in children**. *Neurotoxicology* 2018, **64**:85-93.

35. Zhang Y, Lu Z, Sun Y, Guo L, Zhang X, Liao Y, Kang Z, Feng X, Zhao G, Sun J *et al*: **Interactive effect of air pollution and genetic risk of depression on processing speed by resting-state functional connectivity of occipitoparietal network**. *BMC Med* 2024, **22**(1):392.

36. Ascone L, Kling C, Wieczorek J, Koch C, Kuhn S: **A longitudinal, randomized experimental pilot study to investigate the effects of airborne infrasound on human mental health, cognition, and brain structure**. *Sci Rep* 2021, **11**(1):3190.

37. Cheng H, Sun G, Li M, Yin M, Chen H: **Neuron loss and dysfunctionality in hippocampus explain aircraft noise induced working memory impairment: a resting-state fMRI study on military pilots**. *Biosci Trends* 2019, **13**(5):430-440.

38. Dewey RS, Francis ST, Guest H, Prendergast G, Millman RE, Plack CJ, Hall DA: **The association between subcortical and cortical fMRI and lifetime noise exposure in listeners with normal hearing thresholds**. *Neuroimage* 2020, **204**:116239.

39. Forlim CG, Ascone L, Koch C, Kuhn S: **Resting state network changes induced by experimental inaudible infrasound exposure and associations with self-reported noise sensitivity and annoyance**. *Sci Rep* 2024, **14**(1):24555.

40. Martínez-Vilavella G, Pujol J, Blanco-Hinojo L, Deus J, Rivas I, Persavento C, Sunyer J, Foraster M: **The effects of exposure to road traffic noise at school on central auditory pathway functional connectivity**. *Environ Res* 2023, **226**:115574.

41. Quarto T, Fasano MC, Taurisano P, Fazio L, Antonucci LA, Gelao B, Romano R, Mancini M, Porcelli A, Masellis R *et al*: **Interaction between DRD2 variation and sound environment on mood and emotion-related brain activity**. *Neuroscience* 2017, **341**:9-17.

42. Simon KR, Merz EC, He X, Noble KG: **Environmental noise, brain structure, and language development in children**. *Brain Lang* 2022, **229**:105112.

43. Yu JF, Lee KC, Hong HH, Kuo SB, Wu CD, Wai YY, Chen YF, Peng YC: **Human amygdala activation by the sound produced during dental treatment: A fMRI study**. *Noise & health* 2015, **17**(78):337-342.

44. Kühn S, Mascherek A, Filevich E, Lisofsky N, Becker M, Butler O, Lochstet M, Mårtensson J, Wenger E, Lindenberger U *et al*: **Spend time outdoors for your brain - an in-depth longitudinal MRI study**. *The world journal of biological psychiatry : the official journal of the World Federation of Societies of Biological Psychiatry* 2022, **23**(3):201-207.

45. Duval ER, Garfinkel SN, Swain JE, Evans GW, Blackburn EK, Angstadt M, Sripada CS, Liberzon I: **Childhood poverty is associated with altered hippocampal function and visuospatial memory in adulthood**. *Dev Cogn Neurosci* 2017, **23**:39-44.

46. Finn AS, Minas JE, Leonard JA, Mackey AP, Salvatore J, Goetz C, West MR, Gabrieli CFO, Gabrieli JDE: **Functional brain organization of working memory in adolescents varies in relation to family income and academic achievement**. *Developmental science* 2017, **20**(5).

47. Hanson JL, Albert WD, Skinner AT, Shen SH, Dodge KA, Lansford JE: **Resting state coupling between the amygdala and ventromedial prefrontal cortex is related to household income in childhood and indexes future psychological vulnerability to stress**. *Development and psychopathology* 2019, **31**(3):1053-1066.

48. Holz NE, Boecker R, Hohm E, Zohsel K, Buchmann AF, Blomeyer D, Jennen-Steinmetz C, Baumeister S, Hohmann S, Wolf I *et al*: **The long-term impact of early life poverty on orbitofrontal cortex volume in adulthood: results from a prospective study over 25 years**. *Neuropsychopharmacology* 2015, **40**(4):996-1004.

49. Liberzon I, Ma ST, Okada G, Ho SS, Swain JE, Evans GW: **Childhood poverty and recruitment of adult emotion regulatory neurocircuitry**. *Soc Cogn Affect Neurosci* 2015, **10**(11):1596-1606.

50. Marshall NA, Marusak HA, Sala-Hamrick KJ, Crespo LM, Rabinak CA, Thomason ME: **Socioeconomic disadvantage and altered corticostriatal circuitry in urban youth**. *Hum Brain Mapp* 2018, **39**(5):1982-1994.

51. Tomlinson RC, Burt SA, Waller R, Jonides J, Miller AL, Gearhardt AN, Peltier SJ, Klump KL, Lumeng JC, Hyde LW: **Neighborhood poverty predicts altered neural and behavioral response inhibition**. *Neuroimage* 2020, **209**:116536.

52. Weissman DG, Conger RD, Robins RW, Hastings PD, Guyer AE: **Income change alters default mode network connectivity for adolescents in poverty**. *Dev Cogn Neurosci* 2018, **30**:93-99.

53. White SF, Voss JL, Chiang JJ, Wang L, McLaughlin KA, Miller GE: **Exposure to violence and low family income are associated with heightened amygdala responsiveness to threat among adolescents**. *Dev Cogn Neurosci* 2019, **40**:100709.

54. Ziegler G, Moutoussis M, Hauser TU, Fearon P, Bullmore ET, Goodyer IM, Fonagy P, Jones PB, Lindenberger U, Dolan RJ: **Childhood socio-economic disadvantage predicts reduced myelin growth across adolescence and young adulthood**. *Hum Brain Mapp* 2020, **41**(12):3392-3402.

55. Ai Y, Hummel T, Nie H, Yang J, Han P: **Reduced neural responses to pleasant odor stimuli after acute psychological stress is associated with cortisol reactivity**. *Neuroimage* 2023, **284**:120474.

56. Chang J, Hu J, Li CR, Yu R: **Neural correlates of enhanced response inhibition in the aftermath of stress**. *Neuroimage* 2020, **204**:116212.

57. Clemens B, Wagels L, Bauchmuller M, Bergs R, Habel U, Kohn N: **Alerted default mode: functional connectivity changes in the aftermath of social stress**. *Sci Rep* 2017, **7**:40180.

58. Corr R, Glier S, Bizzell J, Pelletier-Baldelli A, Campbell A, Killian-Farrell C, Belger A: **Triple Network Functional Connectivity During Acute Stress in Adolescents and the Influence of Polyvictimization**. *Biol Psychiatry Cogn Neurosci Neuroimaging* 2022, **7**(9):867-875.

59. Dahm AS, Schmierer P, Veer IM, Streit F, Gorgen A, Kruschwitz J, Wust S, Kirsch P, Walter H, Erk S: **The burden of conscientiousness? Examining brain activation and cortisol response during social evaluative stress**. *Psychoneuroendocrinology* 2017, **78**:48-56.

60. Fan Y, Pestke K, Feeser M, Aust S, Pruessner JC, Böker H, Bajbouj M, Grimm S: **Amygdala-Hippocampal Connectivity Changes During Acute Psychosocial Stress: Joint Effect of Early Life Stress and Oxytocin**. *Neuropsychopharmacology : official publication of the American College of Neuropsychopharmacology* 2015, **40**(12):2736-2744.

61. Goodman AM, Wheelock MD, Harnett NG, Mrug S, Granger DA, Knight DC: **The hippocampal response to psychosocial stress varies with salivary uric acid level**. *Neuroscience* 2016, **339**:396-401.

62. Goodman AM, Harnett NG, Wheelock MD, Hurst DR, Orem TR, Gossett EW, Dunaway CA, Mrug S, Knight DC: **Anticipatory prefrontal cortex activity underlies stress-induced changes in Pavlovian fear conditioning**. *Neuroimage* 2018, **174**:237-247.

63. Grande LA, Olsavsky AK, Erhart A, Dufford AJ, Tribble R, Phan KL, Kim P: **Postpartum Stress and Neural Regulation of Emotion among First-Time Mothers**. *Cogn Affect Behav Neurosci* 2021, **21**(5):1066-1082.

64. Harms MB, Birn R, Provencal N, Wiechmann T, Binder EB, Giakas SW, Roeber BJ, Pollak SD: **Early life stress, FK506 binding protein 5 gene (FKBP5) methylation, and inhibition-related prefrontal function: A prospective longitudinal study**. *Dev Psychopathol* 2017, **29**(5):1895-1903.

65. Henze GI, Rosenbaum D, Bärtl C, Laicher H, Konzok J, Kudielka BM, Fallgatter AJ, Wüst S, Ehlis AC, Kreuzpointner L: **Comparing two psychosocial stress paradigms for imaging environments - ScanSTRESS and fNIRS-TSST: Correlation structures between stress responses**. *Behav Brain Res* 2023, **436**:114080.

66. Kim H, Jeon MJ, Seong G, Jung YC, Park JY, Lee D: **Functional connectivity of the amygdala in relation to high stress and low mindfulness**. *Neurosci Lett* 2024, **842**:137985.

67. Kruse O, Tapia Leon I, Stalder T, Stark R, Klucken T: **Altered reward learning and hippocampal connectivity following psychosocial stress**. *Neuroimage* 2018, **171**:15-25.

68. Lee D, Kim W, Lee JE, Lee J, Kim YT, Lee SK, Oh SS, Park KS, Koh SB, Kim C *et al*: **Changes in intrinsic functional brain connectivity related to occupational stress of firefighters**. *Psychiatry Res* 2022, **314**:114688.

69. Ma Y, Kochunov P, Kvarta MD, LeGates T, Adhikari BM, Chiappelli J, van der Vaart A, Goldwaser EL, Bruce H, Hatch KS *et al*: **Reciprocal relationships between stress and depressive symptoms: the essential role of the nucleus accumbens**. *Psychological medicine* 2024, **54**(5):1045-1056.

70. Martin-Perez C, Contreras-Rodriguez O, Vilar-Lopez R, Verdejo-Garcia A: **Hypothalamic Networks in Adolescents With Excess Weight: Stress-Related Connectivity and Associations With Emotional Eating**. *J Am Acad Child Adolesc Psychiatry* 2019, **58**(2):211-220 e215.

71. Meine LE, Meier J, Meyer B, Wessa M: **Don't stress, it's under control: Neural correlates of stressor controllability in humans**. *Neuroimage* 2021, **245**:118701.

72. Metz S, Aust S, Fan Y, Bonke L, Harki Z, Gartner M, Bajbouj M, Grimm S: **The influence of early life stress on the integration of emotion and working memory**. *Behavioural brain research* 2018, **339**:179-185.

73. Niehaus CE, Chaplin TM, Goncalves SF, Semelsberger R, Thompson JC: **Maternal stress and adolescent brain structure and function**. *Brain Behav* 2019, **9**(6):e01311.

74. Pagliaccio D, Luby JL, Bogdan R, Agrawal A, Gaffrey MS, Belden AC, Botteron KN, Harms MP, Barch DM: **Amygdala functional connectivity, HPA axis genetic variation, and life stress in children and relations to anxiety and emotion regulation**. *Journal of abnormal psychology* 2015, **124**(4):817-833.

75. Reinelt J, Uhlig M, Muller K, Lauckner ME, Kumral D, Schaare HL, Baczkowski BM, Babayan A, Erbey M, Roebbig J *et al*: **Acute psychosocial stress alters thalamic network centrality**. *Neuroimage* 2019, **199**:680-690.

76. Rosada C, Lipka R, Metz S, Otte C, Heekeren H, Wingenfeld K: **Effects of stress-related neuromodulators on amygdala and hippocampus resting state functional connectivity**. *J Psychopharmacol* 2024, **38**(7):604-614.

77. Sevinc G, Holzel BK, Hashmi J, Greenberg J, McCallister A, Treadway M, Schneider ML, Dusek JA, Carmody J, Lazar SW: **Common and Dissociable Neural Activity After Mindfulness-Based Stress Reduction and Relaxation Response Programs**. *Psychosom Med* 2018, **80**(5):439-451.

78. Shields GS, McCullough AM, Ritchey M, Ranganath C, Yonelinas AP: **Stress and the medial temporal lobe at rest: Functional connectivity is associated with both memory and cortisol**. *Psychoneuroendocrinology* 2019, **106**:138-146.

79. Sinha R, Lacadie CM, Constable RT, Seo D: **Dynamic neural activity during stress signals resilient coping**. *Proc Natl Acad Sci U S A* 2016, **113**(31):8837-8842.

80. Sokołowski A, Folkierska-Żukowska M, Jednoróg K, Wypych M, Dragan W: **It is Not (Always) the Mismatch That Beats You-On the Relationship Between Interaction of Early and Recent Life Stress and Emotion Regulation, an fMRI Study**. *Brain Topogr* 2022, **35**(2):219-231.

81. Spencer C, Mill RD, Bhanji JP, Delgado MR, Cole MW, Tricomi E: **Acute psychosocial stress modulates neural and behavioral substrates of cognitive control**. *Human brain mapping* 2024, **45**(8):e26716.

82. Taren AA, Gianaros PJ, Greco CM, Lindsay EK, Fairgrieve A, Brown KW, Rosen RK, Ferris JL, Julson E, Marsland AL *et al*: **Mindfulness meditation training alters stress-related amygdala resting state functional connectivity: a randomized controlled trial**. *Soc Cogn Affect Neurosci* 2015, **10**(12):1758-1768.

83. Tomova L, Majdandžic J, Hummer A, Windischberger C, Heinrichs M, Lamm C: **Increased neural responses to empathy for pain might explain how acute stress increases prosociality**. *Soc Cogn Affect Neurosci* 2017, **12**(3):401-408.

84. Tomova L, Saxe R, Klobl M, Lanzenberger R, Lamm C: **Acute stress alters neural patterns of value representation for others**. *Neuroimage* 2020, **209**:116497.

85. Uhlig M, Reinelt JD, Lauckner ME, Kumral D, Schaare HL, Mildner T, Babayan A, Moller HE, Engert V, Villringer A *et al*: **Rapid volumetric brain changes after acute psychosocial stress**. *Neuroimage* 2023, **265**:119760.

86. Uy JP, Galván A: **Acute stress increases risky decisions and dampens prefrontal activation among adolescent boys**. *Neuroimage* 2017, **146**:679-689.

87. Vidal-Ribas P, Benson B, Vitale AD, Keren H, Harrewijn A, Fox NA, Pine DS, Stringaris A: **Bidirectional Associations Between Stress and Reward Processing in Children and Adolescents: A Longitudinal Neuroimaging Study**. *Biol Psychiatry Cogn Neurosci Neuroimaging* 2019, **4**(10):893-901.

88. Yamamoto T, Toki S, Siegle GJ, Takamura M, Takaishi Y, Yoshimura S, Okada G, Matsumoto T, Nakao T, Muranaka H *et al*: **Increased amygdala reactivity following early life stress: a potential resilience enhancer role**. *BMC psychiatry* 2017, **17**(1):27.

89. Zschucke E, Renneberg B, Dimeo F, Wustenberg T, Strohle A: **The stress-buffering effect of acute exercise: Evidence for HPA axis negative feedback**. *Psychoneuroendocrinology* 2015, **51**:414-425.

90. Akerstedt T, Lekander M, Nilsonne G, Tamm S, d'Onofrio P, Kecklund G, Fischer H, Schwarz J, Petrovic P, Mansson KNT: **Gray Matter Volume Correlates of Sleepiness: A Voxel-Based Morphometry Study in Younger and Older Adults**. *Nat Sci Sleep* 2020, **12**:289-298.

91. Alsameen M, DiFrancesco MW, Drummond SPA, Franzen PL, Beebe DW: **Neuronal activation and performance changes in working memory induced by chronic sleep restriction in adolescents**. *J Sleep Res* 2021, **30**(5):e13304.

92. Boes AD, Fischer D, Geerling JC, Bruss J, Saper CB, Fox MD: **Connectivity of sleep- and wake-promoting regions of the human hypothalamus observed during resting wakefulness**. *Sleep* 2018, **41**(9).

93. Cai Y, Mai Z, Li M, Zhou X, Ma N: **Altered frontal connectivity after sleep deprivation predicts sustained attentional impairment: A resting-state functional magnetic resonance imaging study**. *J Sleep Res* 2021, **30**(5):e13329.

94. Chai Y, Fang Z, Yang FN, Xu S, Deng Y, Raine A, Wang J, Yu M, Basner M, Goel N *et al*: **Two nights of recovery sleep restores hippocampal connectivity but not episodic memory after total sleep deprivation**. *Sci Rep* 2020, **10**(1):8774.

95. Fang Z, Spaeth AM, Ma N, Zhu S, Hu S, Goel N, Detre JA, Dinges DF, Rao H: **Altered salience network connectivity predicts macronutrient intake after sleep deprivation**. *Sci Rep* 2015, **5**:8215.

96. Feng P, Becker B, Feng T, Zheng Y: **Alter spontaneous activity in amygdala and vmPFC during fear consolidation following 24 h sleep deprivation**. *Neuroimage* 2018, **172**:461-469.

97. Guo Z, Jiang Z, Jiang B, McClure MA, Mu Q: **High-Frequency Repetitive Transcranial Magnetic Stimulation Could Improve Impaired Working Memory Induced by Sleep Deprivation**. *Neural plasticity* 2019, **2019**:7030286.

98. Hermesdorf M, Szentkiralyi A, Teismann H, Teismann I, Young P, Berger K: **Sleep characteristics, cognitive performance, and gray matter volume: findings from the BiDirect Study**. *Sleep* 2021, **44**(3).

99. Kang SG, Yoon HK, Cho CH, Kwon S, Kang J, Park YM, Lee E, Kim L, Lee HJ: **Decrease in fMRI brain activation during working memory performed after sleeping under 10 lux light**. *Sci Rep* 2016, **6**:36731.

100. Killgore WD, Vanuk JR, Knight SA, Markowski SM, Pisner D, Shane B, Fridman A, Alkozei A: **Daytime sleepiness is associated with altered resting thalamocortical connectivity**. *Neuroreport* 2015, **26**(13):779-784.

101. Kim KT, Kim H, Kong J, Kim JB: **Enhanced functional connectivity in the reward circuitry in healthy adults with weekend catch-up sleep**. *Human brain mapping* 2023, **44**(14):4927-4937.

102. Klumpers UM, Veltman DJ, van Tol MJ, Kloet RW, Boellaard R, Lammertsma AA, Hoogendijk WJ: **Neurophysiological effects of sleep deprivation in healthy adults, a pilot study**. *PLoS One* 2015, **10**(1):e0116906.

103. Krause AJ, Prather AA, Wager TD, Lindquist MA, Walker MP: **The Pain of Sleep Loss: A Brain Characterization in Humans**. *J Neurosci* 2019, **39**(12):2291-2300.

104. Lapidaire W, Urrila AS, Artiges E, Miranda R, Vulser H, Bezivin-Frere P, Lemaitre H, Penttila J, Banaschewski T, Bokde ALW *et al*: **Irregular sleep habits, regional grey matter volumes, and psychological functioning in adolescents**. *PLoS One* 2021, **16**(2):e0243720.

105. Lei Y, Shao Y, Wang L, Ye E, Jin X, Zou F, Zhai T, Li W, Yang Z: **Altered superficial amygdala-cortical functional link in resting state after 36 hours of total sleep deprivation**. *Journal of neuroscience research* 2015, **93**(12):1795-1803.

106. Lei Y, Wang L, Chen P, Li Y, Han W, Ge M, Yang L, Chen S, Hu W, Wu X *et al*: **Neural correlates of increased risk-taking propensity in sleep-deprived people along with a changing risk level**. *Brain Imaging Behav* 2017, **11**(6):1910-1921.

107. Li G, Zhong D, Li B, Chen Y, Yang L, Li CR: **Sleep Deficits Inter-Link Lower Basal Forebrain-Posterior Cingulate Connectivity and Perceived Stress and Anxiety Bidirectionally in Young Men**. *The international journal of neuropsychopharmacology* 2023, **26**(12):879-889.

108. Liu CH, Liu CZ, Zhu XQ, Fang JL, Lu SL, Tang LR, Wang CY, Liu QQ: **Increased Posterior Insula-Sensorimotor Connectivity Is Associated with Cognitive Function in Healthy Participants with Sleep Complaints**. *Frontiers in human neuroscience* 2018, **12**:35.

109. Motomura Y, Katsunuma R, Yoshimura M, Mishima K: **Two Days' Sleep Debt Causes Mood Decline During Resting State Via Diminished Amygdala-Prefrontal Connectivity**. *Sleep* 2017, **40**(10).

110. Neumann N, Lotze M, Domin M: **Sex-specific association of poor sleep quality with gray matter volume**. *Sleep* 2020, **43**(9).

111. Pan L, Mai Z, Wang J, Ma N: **Altered vigilant maintenance and reorganization of rich-clubs in functional brain networks after total sleep deprivation**. *Cereb Cortex* 2023, **33**(4):1140-1154.

112. Poudel GR, Innes CRH, Jones RD: **Temporal evolution of neural activity and connectivity during microsleeps when rested and following sleep restriction**. *Neuroimage* 2018, **174**:263-273.

113. Samanta A, van Rongen LS, Rossato JI, Jacobse J, Schoenfeld R, Genzel L: **Sleep Leads to Brain-Wide Neural Changes Independent of Allocentric and Egocentric Spatial Training in Humans and Rats**. *Cereb Cortex* 2021, **31**(11):4970-4985.

114. Shao Y, Lei Y, Wang L, Zhai T, Jin X, Ni W, Yang Y, Tan S, Wen B, Ye E *et al*: **Altered resting-state amygdala functional connectivity after 36 hours of total sleep deprivation**. *PLoS One* 2014, **9**(11):e112222.

115. Shen H, Xu H, Wang L, Lei Y, Yang L, Zhang P, Qin J, Zeng LL, Zhou Z, Yang Z *et al*: **Making group inferences using sparse representation of resting-state functional mRI data with application to sleep deprivation**. *Human brain mapping* 2017, **38**(9):4671-4689.

116. Sterpenich V, Ceravolo L, Schwartz S: **Sleep deprivation disrupts the contribution of the hippocampus to the formation of novel lexical associations**. *Brain Lang* 2017, **167**:61-71.

117. Sun J, Zhao R, Yang X, Deng H, Zhu Y, Chen Y, Yuan K, Xi Y, Yin H, Qin W: **Alteration of Brain Gray Matter Density After 24 h of Sleep Deprivation in Healthy Adults**. *Front Neurosci* 2020, **14**:754.

118. Tashjian SM, Goldenberg D, Galván A: **Neural connectivity moderates the association between sleep and impulsivity in adolescents**. *Developmental cognitive neuroscience* 2017, **27**:35-44.

119. Tomasi D, Wang GJ, Volkow ND: **Association between striatal dopamine D2/D3 receptors and brain activation during visual attention: effects of sleep deprivation**. *Transl Psychiatry* 2016, **6**(5):e828.

120. Toschi N, Passamonti L, Bellesi M: **Sleep quality relates to emotional reactivity via intracortical myelination**. *Sleep* 2021, **44**(1).

121. Urrila AS, Artiges E, Massicotte J, Miranda R, Vulser H, Bezivin-Frere P, Lapidaire W, Lemaitre H, Penttila J, Conrod PJ *et al*: **Sleep habits, academic performance, and the adolescent brain structure**. *Sci Rep* 2017, **7**:41678.

122. van den Berg NH, Pozzobon A, Fang Z, Al-Kuwatli J, Toor B, Ray LB, Fogel SM: **Sleep Enhances Consolidation of Memory Traces for Complex Problem-Solving Skills**. *Cereb Cortex* 2022, **32**(4):653-667.

123. Wang Y, Jiang P, Tang S, Lu L, Bu X, Zhang L, Gao Y, Li H, Hu X, Wang S *et al*: **Left superior temporal sulcus morphometry mediates the impact of anxiety and depressive symptoms on sleep quality in healthy adults**. *Soc Cogn Affect Neurosci* 2021, **16**(5):492-501.

124. Ye HT, Lu CQ, Wang C, Zhang D, Li YF, Feng XY, Wang HP, Mao YY, Ji MH, Yang JJ: **Plasma Aβ level alterations after sleep deprivation correspond to brain structural remodeling in medical night shift workers**. *Brain Res Bull* 2023, **203**:110776.

125. Zhang R, Tomasi D, Shokri-Kojori E, Wiers CE, Wang GJ, Volkow ND: **Sleep inconsistency between weekends and weekdays is associated with changes in brain function during task and rest**. *Sleep* 2020, **43**(10).

126. Zhang L, Cao G, Liu Z, Bai Y, Li D, Liu J, Yin H: **The gray matter volume of bilateral inferior temporal gyrus in mediating the association between psychological stress and sleep quality among Chinese college students**. *Brain Imaging Behav* 2022, **16**(2):557-564.

127. Zhang H, Lei X: **Effect of subjective sleep quality on aggression: A two-year longitudinal and fMRI pilot study**. *Biol Psychol* 2023, **176**:108454.

128. Zhao R, Zhang X, Fei N, Zhu Y, Sun J, Liu P, Yang X, Qin W: **Decreased cortical and subcortical response to inhibition control after sleep deprivation**. *Brain Imaging Behav* 2019, **13**(3):638-650.

129. Zhu Y, Wang C, Xu Z, Guo F, Chang Y, Liu J, Liu W, Fang P, Zheng M: **Individualized rTMS Intervention Targeting Sleep Deprivation-Induced Vigilance Decline: Task fMRI-Guided Approach**. *CNS neuroscience & therapeutics* 2024, **30**(11):e70087.

130. Vermeulen R, Schymanski EL, Barabasi AL, Miller GW: **The exposome and health: Where chemistry meets biology**. *Science* 2020, **367**(6476):392-396.
